# Supplementary material for: Selective CO2 adsorption and theoretical simulation of a stable Co(ii)-based metal–organic framework with tunable crystal size
Source: Royal Society of Chemistry journal article supplement (doi:10.1039/c8ce01942h), 2018-12-17
Supplement: c8ce01942h1.pdf [file c8ce01942h1.pdf]

**Selective CO<sub>2</sub> adsorption and theoretical simulation  
of a stable Co(II)-based metal-organic framework  
with tunable crystal size**

Bo-Wen Qin, Bao-Lei Zhou, Zheng Cui, Lei Zhou, Xiao-Ying Zhang,\*

Wen-Liang Li,\* Jing-Ping Zhang\*

*Email addresses:* zhangxy218@nenu.edu.cn (X.-Y. Zhang); liw1926@nenu.edu.cn  
(W.-L. Li); jpzhang@nenu.edu.cn (J.-P. Zhang)

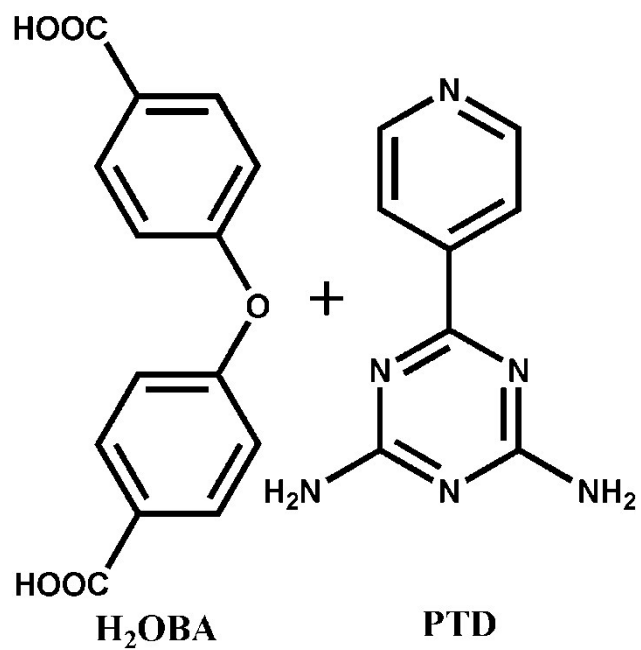

**Scheme S1.** The H<sub>2</sub>OBA ligand (left) and PTD ligand (right).

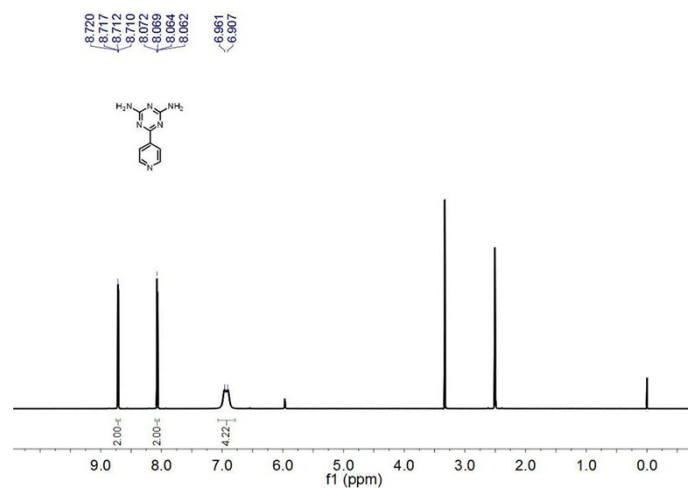

**Fig. S1** The <sup>1</sup>H NMR spectrum of PTD ligand.

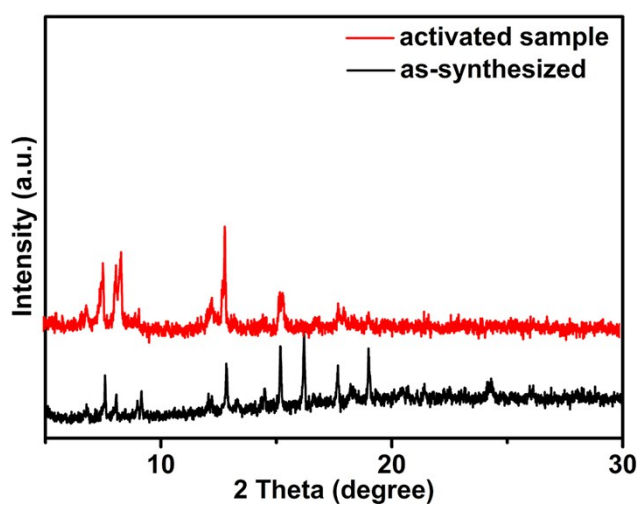

**Fig. S2** PXRD patterns of complex 1 activated by acetone at 175°C in vacuum.

**Table S1.** Crystallographic data for compound **1**.

| Compound                                    | Compound <b>1</b>                                                              |
|---------------------------------------------|--------------------------------------------------------------------------------|
| empirical formula                           | C <sub>75</sub> H <sub>77</sub> N <sub>9</sub> O <sub>29</sub> Co <sub>2</sub> |
| formula weight                              | 1686.22                                                                        |
| <i>T</i> [K]                                | 293(2)                                                                         |
| crystal system                              | orthorhombic                                                                   |
| space group                                 | <i>Fdd2</i>                                                                    |
| <i>a</i> [Å]                                | 39.377                                                                         |
| <i>b</i> [Å]                                | 43.654                                                                         |
| <i>c</i> [Å]                                | 38.551                                                                         |
| $\alpha$ [°]                                | 90.00                                                                          |
| $\beta$ [°]                                 | 90.00                                                                          |
| $\gamma$ [°]                                | 90.00                                                                          |
| <i>V</i>                                    | 66267.80                                                                       |
| <i>Z</i>                                    | 16                                                                             |
| $\rho_{\text{calcd}}$ [g cm <sup>-3</sup> ] | 0.984                                                                          |
| $\mu$ [mm <sup>-1</sup> ]                   | 0.644                                                                          |
| <i>F</i> (000)                              | 19968                                                                          |
| reflections collected                       | 110280                                                                         |
| independent reflections                     | 27283                                                                          |
| GOF                                         | 1.001                                                                          |
| $R_1$ , <sup>[a]</sup> $I > 2\sigma(I)$     | 0.0489                                                                         |
| $wR_2$ , <sup>[b]</sup> $I > 2\sigma(I)$    | 0.1484                                                                         |

[a]  $R_1 = \sum(|F_0| - |F_c|) / \sum|F_0|$ . [b]  $wR_2 = [\sum w(|F_0|^2 - |F_c|^2)^2 / \sum w(F_0^2)^2]^{1/2}$ .

**Table S2.** Selected bond distances (Å) and bond angles (°) for complex **1**.

|                    |          |                       |            |               |          |
|--------------------|----------|-----------------------|------------|---------------|----------|
| Co(1)-O(16)        | 1.990(5) | Co(2)-O(2)            | 2.049(5)   | Co(3)-O(19)   | 2.116(6) |
| Co(1)-O(7)         | 2.001(5) | Co(2)-O(17)           | 2.079(5)   | Co(4)-O(4)#2  | 2.012(5) |
| Co(1)-O(1)         | 2.019(5) | Co(2)-N(1)            | 2.117(5)   | Co(4)-O(20)   | 2.014(6) |
| Co(1)-O(12)        | 2.073(5) | Co(3)-O(10)           | 2.020(5)   | Co(4)-O(14)#3 | 2.029(5) |
| Co(1)-N(6)#1       | 2.101(5) | Co(3)-O(5)#2          | 2.031(5)   | Co(4)-O(9)    | 2.072(5) |
| Co(2)-O(11)        | 2.015(5) | Co(3)-O(15)#3         | 2.034(5)   | Co(4)-N(12)#4 | 2.074(5) |
| Co(2)-O(6)         | 2.021(5) | Co(3)-N(7)            | 2.115(5)   |               |          |
| O(16)-Co(1)-O(7)   | 163.9(2) | O(10)-Co(3)-O(5)#2    | 91.2(2)    |               |          |
| O(16)-Co(1)-O(11)  | 91.6(3)  | O(10)-Co(3)-O(15)#3   | 94.0(2)    |               |          |
| O(7)-Co(1)-O(1)    | 89.9(3)  | O(5)#2-Co(3)-O(15)#3  | 159.06(19) |               |          |
| O(16)-Co(1)-O(12)  | 87.2(2)  | O(10)-Co(3)-N(7)      | 100.3(2)   |               |          |
| O(7)-Co(1)-O(12)   | 86.6(3)  | O(5)#2-Co(3)-N(7)     | 99.0(2)    |               |          |
| O(1)-Co(1)-O(12)   | 162.2(2) | O(15)#3-Co(3)-N(7)    | 100.0(2)   |               |          |
| O(16)-Co(1)-N(6)#1 | 100.9(2) | O(10)-Co(3)-O(19)     | 163.4(2)   |               |          |
| O(7)-Co(1)-N(6)#1  | 94.5(2)  | O(5)#2-Co(3)-O(19)    | 85.6(2)    |               |          |
| O(1)-Co(1)-N(6)#1  | 102.1(2) | O(15)#3-Co(3)-O(19)   | 83.7(2)    |               |          |
| O(12)-Co(1)-N(6)#1 | 95.6(2)  | N(7)-Co(3)-O(19)      | 96.3(3)    |               |          |
| O(11)-Co(2)-O(6)   | 89.9(2)  | O(4)#2-Co(4)-O(20)    | 92.7(2)    |               |          |
| O(11)-Co(2)-O(2)   | 162.8(2) | O(4)#2-Co(4)-O(14)#3  | 166.3(2)   |               |          |
| O(6)-Co(2)-O(2)    | 88.7(2)  | O(20)-Co(4)-O(14)#3   | 88.3(2)    |               |          |
| O(11)-Co(2)-O(17)  | 90.2(2)  | O(4)#2-Co(4)-O(9)     | 86.6(2)    |               |          |
| O(6)-Co(2)-O(17)   | 161.9(2) | O(20)-Co(4)-O(9)      | 161.0(2)   |               |          |
| O(2)-Co(2)-O(17)   | 85.9(2)  | O(14)#3-Co(4)-O(9)    | 88.1(2)    |               |          |
| O(11)-Co(2)-N(1)   | 101.7(2) | O(4)#2-Co(4)-N(12)#4  | 96.5(2)    |               |          |
| O(6)-Co(2)-N(1)    | 101.3(2) | O(20)-Co(4)-N(12)#4   | 105.1(2)   |               |          |
| O(2)-Co(2)-N(1)    | 95.5(2)  | O(14)#3-Co(4)-N(12)#4 | 96.5(2)    |               |          |
| O(17)-Co(2)-N(1)   | 96.4(2)  | O(9)-Co(4)-N(12)#4    | 93.8(2)    |               |          |

Symmetry codes: #1:  $x+1/4, -y+7/4, z-1/4$ ; #2:  $x+1/4, -y+5/4, z+1/4$ ; #3:  $x-1/4, -y+7/4, z+1/4$ ; #4:  $x-1/4, -y+5/4, z-1/4$

**Table S3.** The elemental analyses (C, H, N) of as-synthesized and desolvated compound **1**, respectively.

| Elements                         | C (%) | H (%) | N (%) |
|----------------------------------|-------|-------|-------|
| as-synthesized compound <b>1</b> | 52.94 | 4.23  | 7.65  |
| desolvated compound <b>1</b>     | 57.18 | 3.12  | 5.98  |

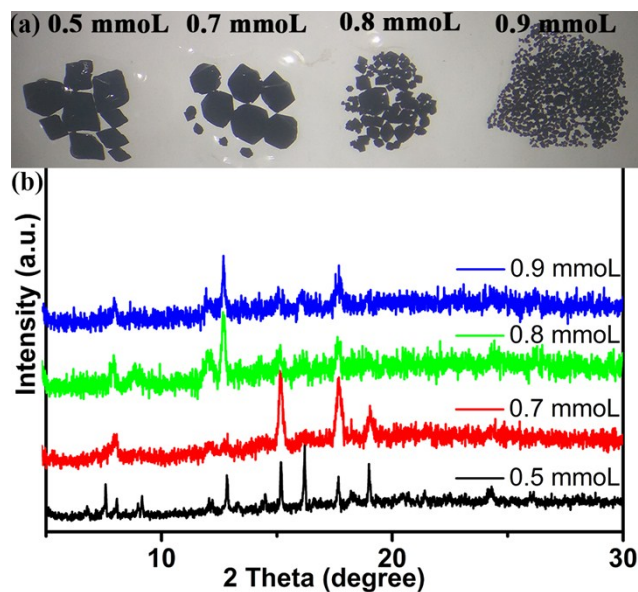

**Fig. S3** (a) In the same lens, the photographic plates of compound **1** synthesized by using different molar PTD ligands; (b) PXRD patterns of complex **1** with different crystal size, which is constructed by changing the amounts of PTD added.

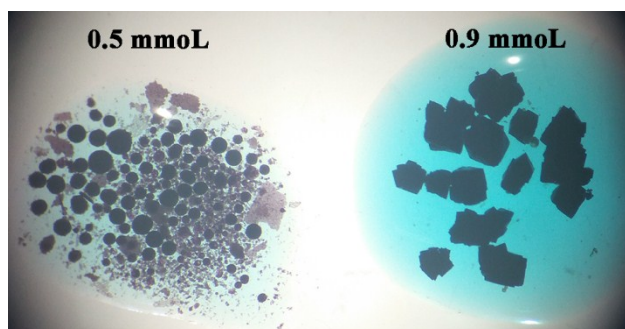

**Fig. S4** In the same lens, the photographic plates of reaction product through using different molar PTD ligands at 120°C for only 6 h.

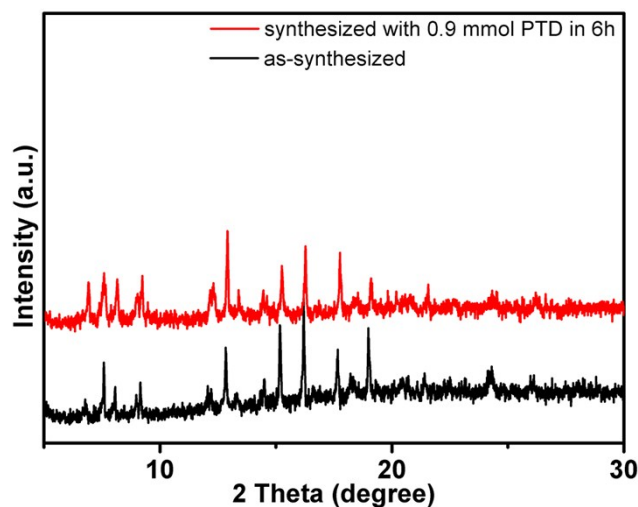

**Fig. S5** PXRD patterns of as-synthesized compound **1** and compound synthesized with 0.9 mmol PTD in 6h. The excellent matching suggests that two compounds are

isostructural.

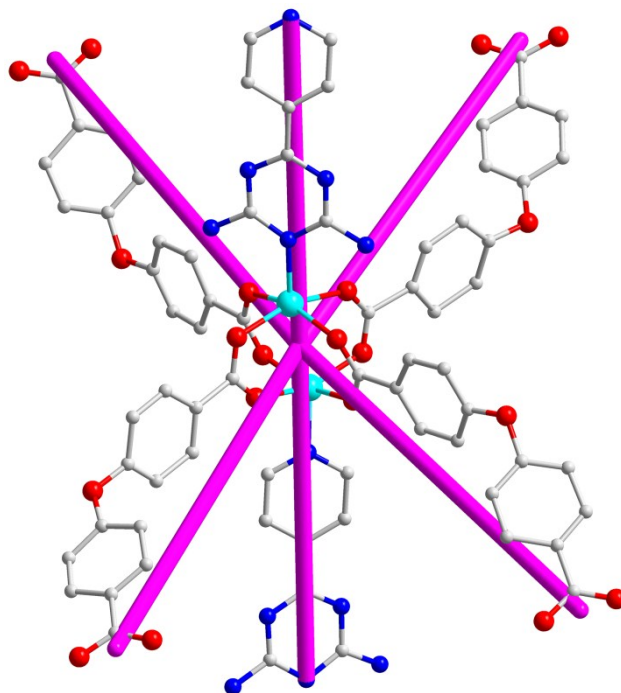

**Fig. S6** The  $\text{Co}_2\text{O}_8\text{N}_2$  paddle-wheel SBU and its topological structure.

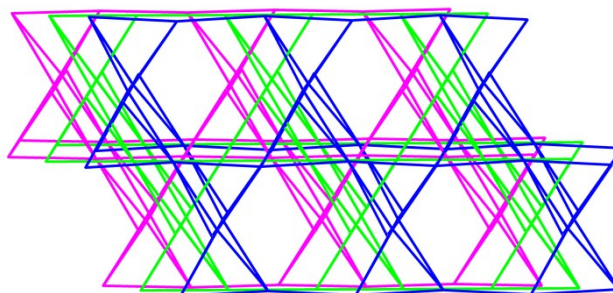

**Fig. S7** Schematic illustration of the three-fold parallel interpenetrated topology.

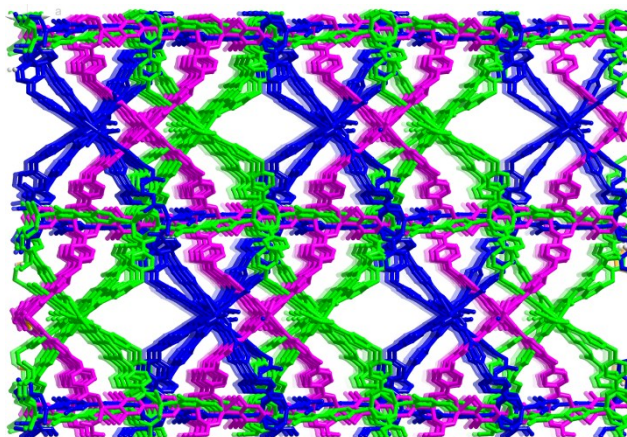

**Fig. S8** The 3D interpenetrated framework of compound **1**, showing the 1D channels.

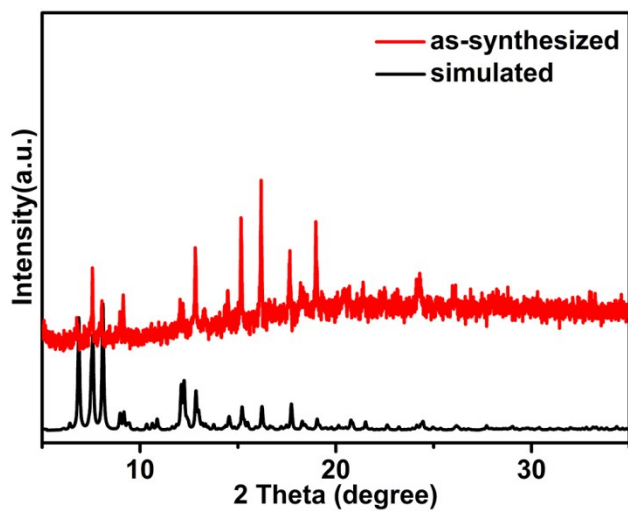

**Fig. S9** PXRD spectra of complex 1.

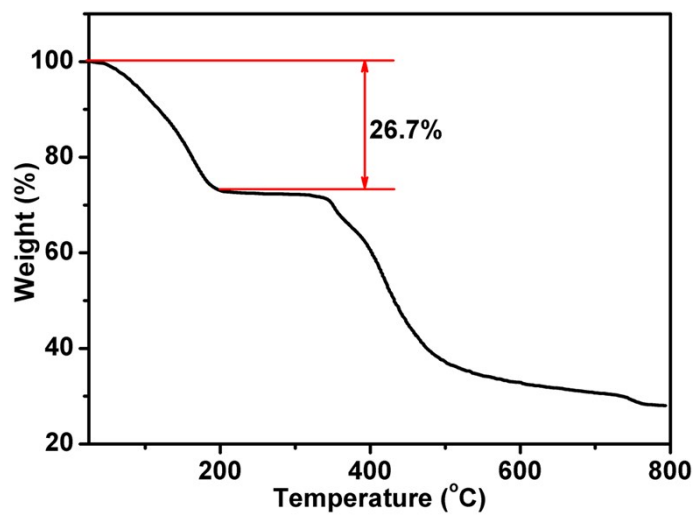

**Fig. S10** TGA curve of complex 1.



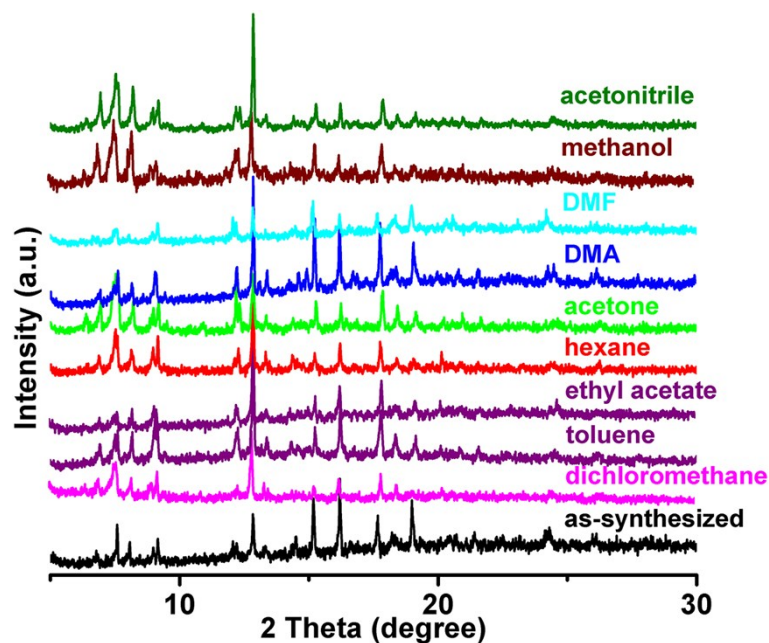

**Fig. S11** PXR D patterns of complex 1 dispersed in different boiling organic solvents.

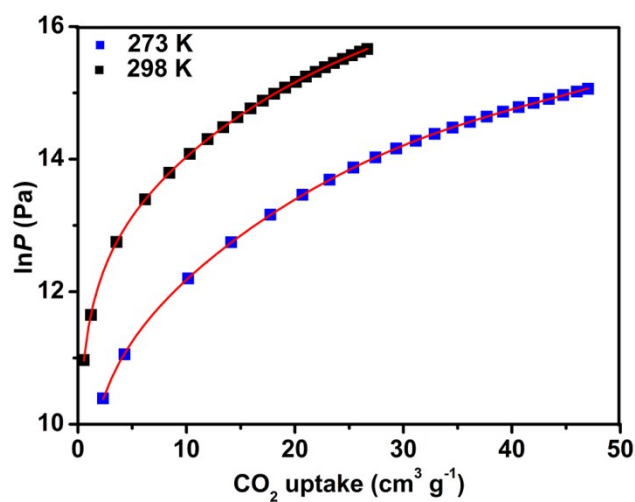

**Fig. S12** Virial analyses of the CO<sub>2</sub> adsorption data at 273 and 298 K for compound 1. Fitting results:  $a_0 = -5410.822$ ,  $a_1 = 55.02785$ ,  $a_2 = -8.65607$ ,  $a_3 = 0.58575$ ,  $a_4 = -0.01225$ ,  $\text{Chi}^2 = 0.00004$ ,  $R^2 = 0.99998$ .
